# Supplementary figures and images for: Antibacterial Effect of Oregano Essential Oil against Vibrio vulnificus and Its Mechanism
Source: MDPI journal article supplement (doi:10.3390/foods11030403), 2022-01-30

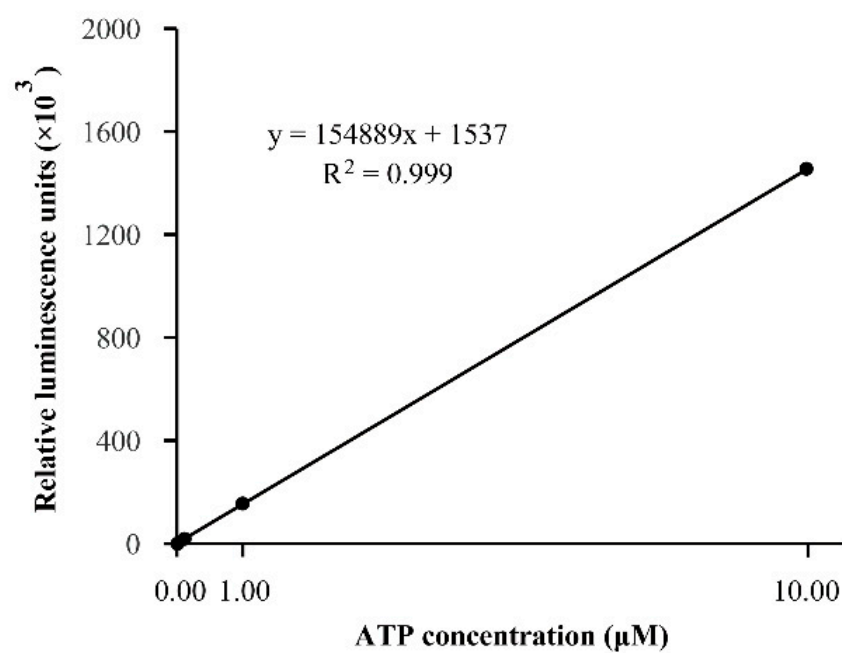

**Figure S1.** The relationship between the concentrations of ATP and relative luminescence units.

Supplement: s1 [file s1]
